# Supplementary material for: First-principles insight into the photoelectronic properties of Ge-based perovskites
Source: Royal Society of Chemistry journal article supplement (doi:10.1039/c6ra18534g), 2016-01-01
Supplement: c6ra18534g1.pdf [file c6ra18534g1.pdf]

## Electronic Supplementary Information

### First-principles insight into photoelectronic properties of Ge-based perovskites

Xiaoqing Lu,<sup>a\*‡</sup> Zigang Zhao,<sup>a‡</sup> Ke Li,<sup>a</sup> Zhaoxiang Han,<sup>a</sup> Shuxian Wei,<sup>a</sup> Chen Guo,<sup>a</sup>  
Sainan Zhou,<sup>a</sup> Zhonghua Wu,<sup>a</sup> Wenyue Guo,<sup>a\*</sup> Chi-man Lawrence Wu<sup>b</sup>

<sup>a</sup> *College of Science, China University of Petroleum, Qingdao, Shandong 266580, P. R. China*

<sup>b</sup> *Department of Physics and Materials Science, City University of Hong Kong, Hong Kong SAR, P. R. China*

\*Corresponding author: Xiaoqing Lu and Wenyue Guo;

‡These authors have made an equal contribution to this work;

E-mail address: luxq@upc.edu.cn and wyguo@upc.edu.cn;

Telephone: 86-532-8698-3372.

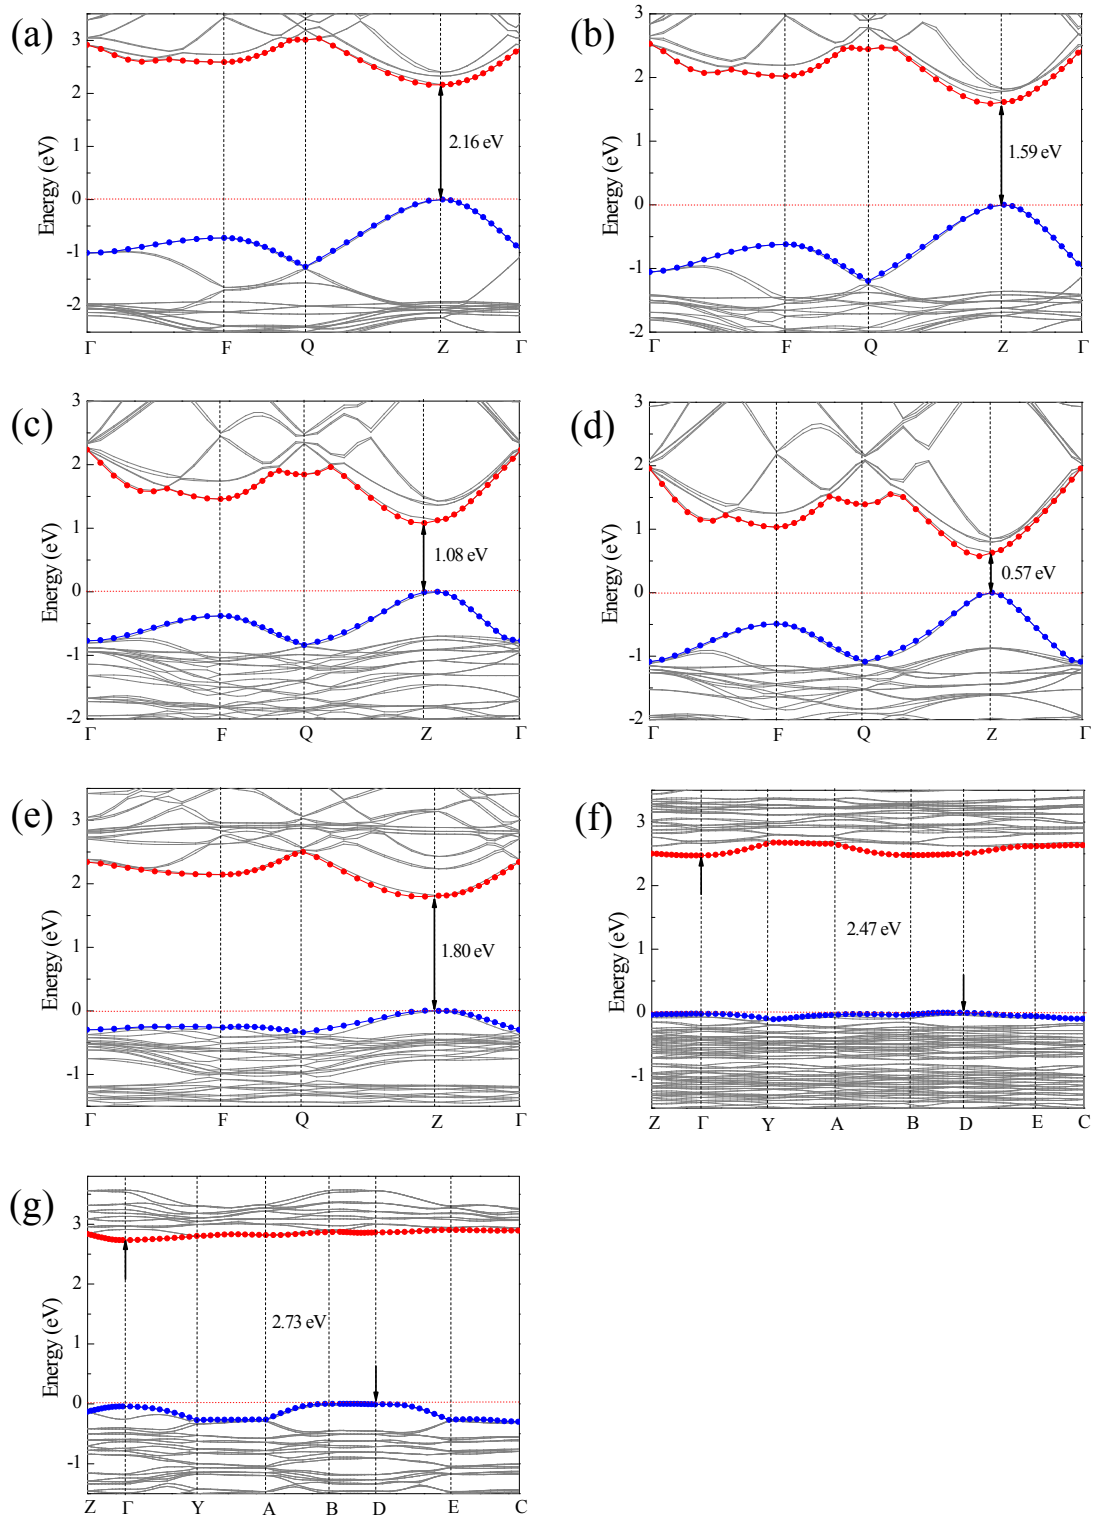

**Fig. S1.** The band structures of perovskites using the PBE+SOC functional: (a) MAgGeCl<sub>3</sub>, (b) MAgGeBr<sub>3</sub>, (c) MAgGeI<sub>3</sub>, (d) CsGeI<sub>3</sub>, (e) FAgGeI<sub>3</sub>, (f) MOGeI<sub>3</sub>, and (g) GAgGeI<sub>3</sub>.

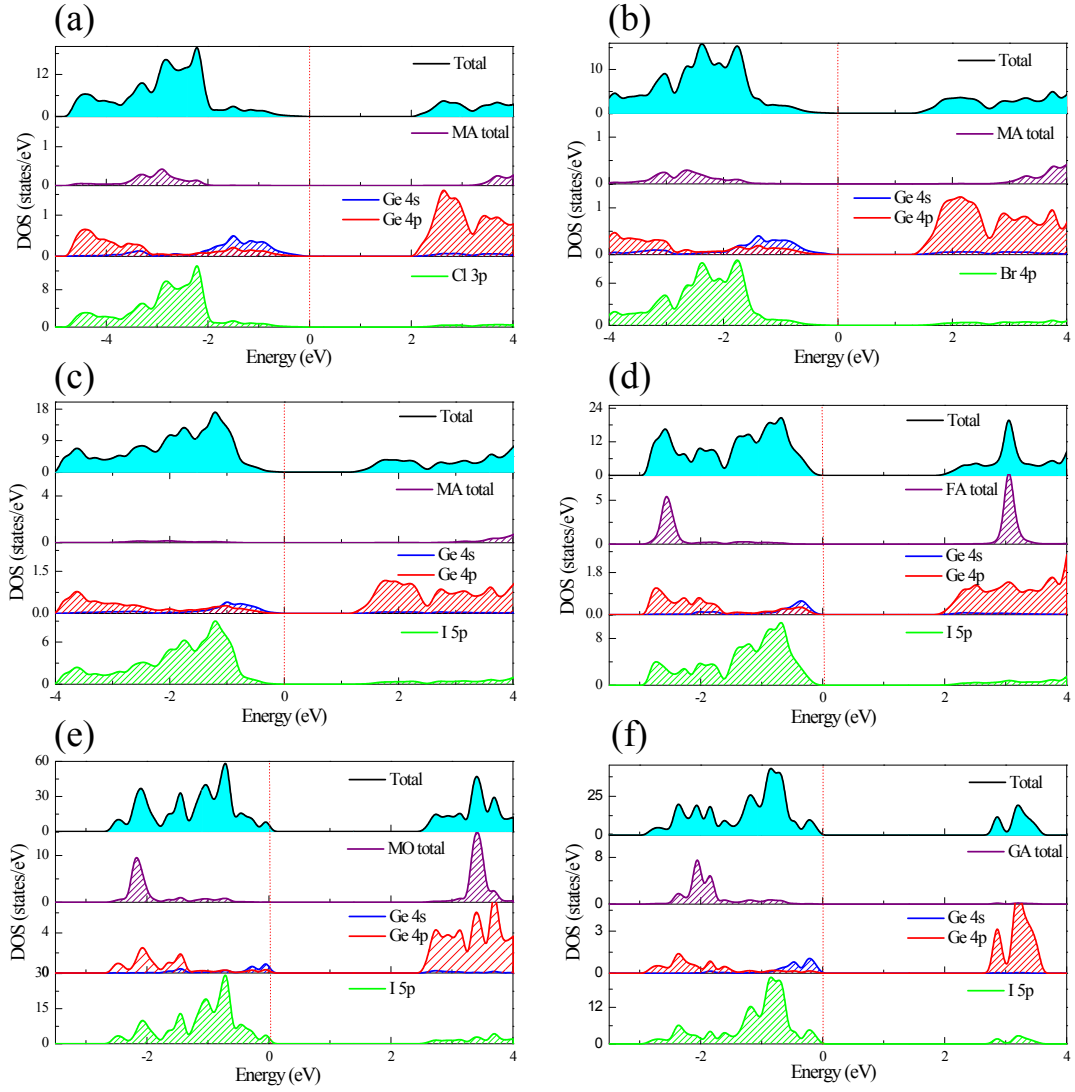

**Fig. S2.** The DOS of (a)  $\text{MAGeCl}_3$ , (b)  $\text{MAGeBr}_3$ , (c)  $\text{MAGeI}_3$ , (d)  $\text{FAGEI}_3$ , (e)  $\text{MOGeI}_3$ , and (f)  $\text{GAGEI}_3$  perovskites.

**Table S1.** The effective masses of electron and hole ( $m_e^*$  and  $m_h^*$ , relative to the electron static mass  $m_0$ ) along the Z (0 0 0.5) $\rightarrow$  $\Gamma$  (0 0 0) direction in the trigonal perovskites by using the PBE and PBE+SOC functionals (in brackets), respectively.

| Effective masses | CsGeI <sub>3</sub> | MAGeCl <sub>3</sub> | MAGeBr <sub>3</sub> | MAGeI <sub>3</sub> | FAGeI <sub>3</sub> |
|------------------|--------------------|---------------------|---------------------|--------------------|--------------------|
| $m_e^*/m_0$      | 0.22 (0.25)        | 0.77 (0.73)         | 0.33 (0.44)         | 0.27 (0.28)        | 0.66 (0.65)        |
| $m_h^*/m_0$      | 0.23 (0.23)        | 0.39 (0.45)         | 0.33 (0.35)         | 0.29 (0.30)        | 0.76 (0.85)        |
